# Supplementary material
Source: PubMed Central journal article supplement (PMC2859461)
Supplement: NIHMS178922-supplement-Figure_S1.pdf [file NIHMS178922-supplement-Figure_S1.pdf]

**a** *AtAGO1* vs *AtAGO5*

*AtAGO1* target region -----CTGCTATTGTCATTCGCCGATTAATATGGATCATTA 40  
*AtAGO5* cDNA (*At2g27880*) AGCAAAGGAATGGAATTTAAGCCTCAACCTGCTATTCCGTTTCATCTCTGTCCCTGAAACATATTGAGGAAGCTCTCTCGATATCCACAAAAGGGCACCTGGTCTCCAACTGTTTCATTGTAATATGGCTGATGTCACTGGATC-----A 1947

TACGGTCAATTCGAAACGATATGTGACACCGAACTGGCATAAGTCTCTCAATGTTGCCGAAAGACATGCTTTAAGATGACCAACATACATGGCTAATGTTGCCCTGAAGATTAATGTGAAGTTGGAGGAAGAACACAGTCTT 190  
 TATGGAAAATTAATAAGCATTTGTGAACAGAAATTTGGGATTTGCTCTCAATGTTGCCAACCTAGACAAGTTAATAAAGCTTCAACAAGCATACATGAAAATGTTGCCCTTGAAGATTAATGTCAAGACTGGAGGAAACACAGTCTT 2097

GTTGATGCTCTATCTAGCCGATTCCTCTAGTCAAGTATCCACCACCAATATATTGGTGCTGATGTACCCACCTCACCTGGAGAGGATCAAGCCATCTATTGCTGCTGTTGTGCCATCTCAGGATGGCCCTGAATCACTAAA 340  
 AATGATGCTATTAGAAGAACATACCTCTTATTAAGTATGATCGTCCAACCATCATATGGTGCTGATGTACCTCACCCACGCTGGAGAGGATCAAGCTCTCTATTGCTGCTGTTGTGCCCTCTATGGACTGGCCCTGACATTAACAAA 2247

TATGCTGGATTAATTTGGCTCAAGCCATAGCCAGGCTGATTCAGGATCTGTTCAAGATGGAAGGATCCAGAAAAGTGTGCTGACTGGTGGCATGATAAAGGATTTGCTCATAGCCCTTCGTA 470  
 TACCCGAGGATTTGTTCTGCTCAAGCTCATAGCCAGAAATTTATTCAGGATCTGTTAAGCTGTTGAGGATCGAAGCTGGCTGATTCCACTCTGGTTTGATAAAGGACATTTCATAGCAATTCAGAGGCTACAGGCCAGATACCT 2397

**b** *AtAGO1* vs *AtAGO10*

*AtAGO1* target region -----CTGCTATTGTCATTCGCCGATAAATAATGATCATTAACGGTATTTGAACGATATGTGACAGTGAATCGCCATAGTCTCTCAATGTGCTCA 101  
*AtAGO10* cDNA (*At5g43810*) AGCATGTTTATCACACTCAATGAACAAAACAAAGGCAAGAGTTAGACTCTGGCTGGCAATATTAAGCTGATAAACAAGTTCACCTTATGGTGATCTTAAGAGAAATCTGTGAACGAGCTGGTTGGATATCTCAATGTGCTCA 2100

CAAAACATGCTTTAAGATGAGCAACAAATACATGGCTAATGTTCCCTTAAGATTAATGTGAAGTTGGAGGAAGAACACAGTCTTGTGATGCTATCTAAGCGAATTCCTTAGTCAAGTCCACCAGCATTAATTTGGT 251  
 CAAAACATGCTTTAAGATGAGCAACAAATATCTGGCAATGTTCCCTTAAGATTAATGTGAAGTTGGAGGAAGAACACAGTCTTGTGATGCTATCTAAGCGAATTCCTTAGTCAAGTCCACCAGCATTAATTTGGT 2250

CTGATGTTACCCACCTCACCCCTGGAGAGATTCAGCCCATCTATTTGCTGCTGTTGTGGCATCTCAAGATGGCCCTGAANTCAGTAAATATGTTGATTAAGTTTGGCTCAAGCCATAGGCAAGGCTCATTCAGATCTGTTGAAAG 401  
 CAGAGCTTACTCACCGAAGAACGGGAAAGGTCAAGCCCTTCATTTGCTGCTGTTGTGGCTCTCAAGCTGGCCCTGAANTCAGTAAATATGTTGATTAAGTTTGGCTCAAGCCATAGGCAAGGCTCATTCAGATTTGTAATAAA 2400

AGTGGAAAGATCCCTCAGAAAAGTGTGTTCACTGGTGGCATGATAAAGAGTTCCTCATAGCCCTTCCGTA 470  
 CATGGCAAGATCCCTGTTCCGGGTAAGTGTATGGCTGATGATCAAGACCTTCTTATCTCAATTAAGCAAGCAAGGGCAAAACCCCTCGAATTATCTTTATCTGATGGAGTAAGCGAAGGGCAATTCTATCAAGTTTACTCT 2550
